# Supplementary material for: Vitamins D2 and D3 Have Overlapping But Different Effects on the Human Immune System Revealed Through Analysis of the Blood Transcriptome
Source: PubMed Central journal article supplement (PMC8908317; doi:10.3389/fimmu.2022.790444), 2022-02-24
Supplement: Image_1.pdf [file Image_1.pdf]

a)

| Probe         | Systematic Name | Symbol | Gene                                            | logFC    | adj.P.Val |
|---------------|-----------------|--------|-------------------------------------------------|----------|-----------|
| A_23_P79231   | NM_134442       | CREB1  | cAMP responsive element binding protein 1       | 0.698193 | 0.021322  |
| A_21_P0014443 | THC2548652      |        | NA                                              | 0.676465 | 0.001531  |
| A_33_P3315320 | NM_173478       | CNTD1  | cyclin N-terminal domain containing 1           | 0.589848 | 0.007448  |
| A_23_P218706  | NM_024325       | ZNF343 | zinc finger protein 343                         | -0.46626 | 0.025991  |
| A_33_P3275998 | NM_004703       | RABEP1 | rabaptin, RAB GTPase binding effector protein 1 | -0.43299 | 0.049483  |

b)

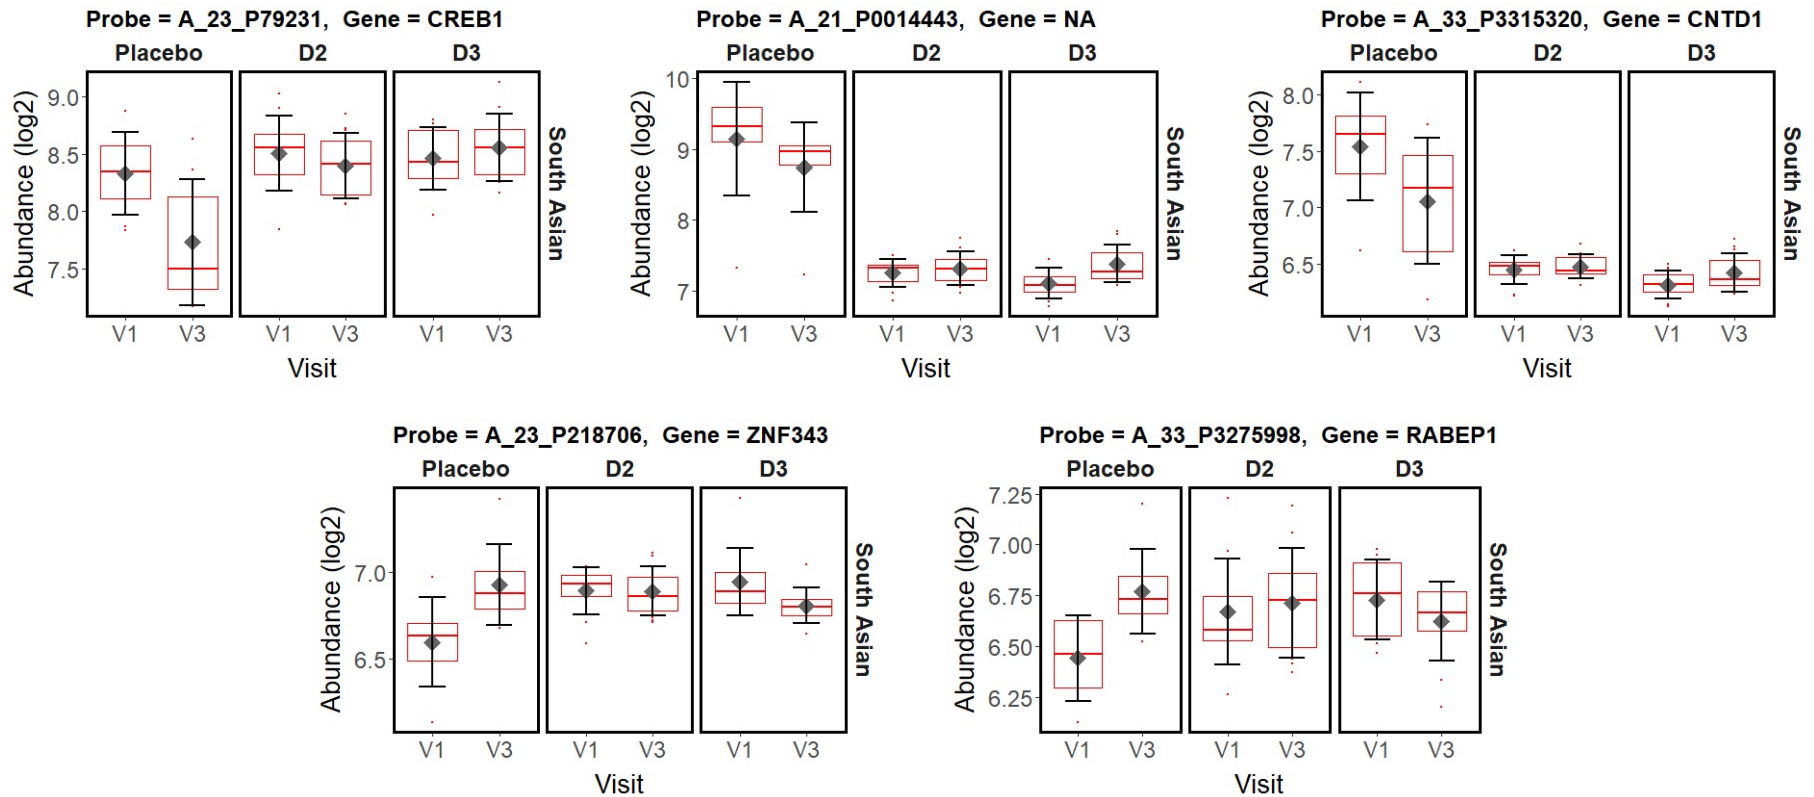

**Supplementary Fig. 1.** Summary of the probes identified as being significantly different in the difference in difference analysis of the SA cohort (comparison [SA D3 V3 v V1] v [SA P V3 v V1] in Fig. 2a). A) Differential expression test results. B) Probe signal abundance (log<sub>2</sub>) distribution across the experimental treatments in the SA cohort.
