# Supplementary material for: Vitamins D2 and D3 Have Overlapping But Different Effects on the Human Immune System Revealed Through Analysis of the Blood Transcriptome
Source: PubMed Central journal article supplement (PMC8908317; doi:10.3389/fimmu.2022.790444), 2022-02-24
Supplement: Image_3.pdf [file Image_3.pdf]

## PCA analysis of the 97 participants – V3 vs V1

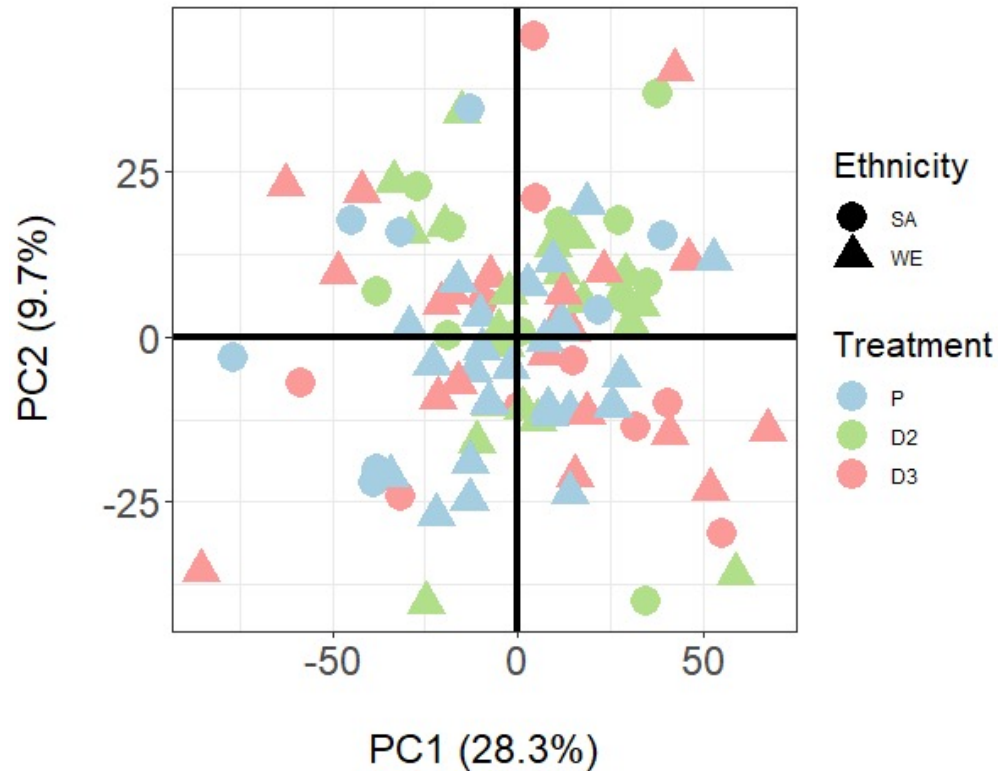

### Supplementary Fig. 3.

Principal component analysis of the transcriptome data for the 97 subjects passing quality control. For each subject participant, a value defined as  $V3 - V1$  was calculated for all the microarray gene probes in the normalised data by subtracting the abundance of each probe signal in the V1 sample from the abundance of the same probe signal in the V3 sample. The resulting matrix of values was analysed using the `pca` function in the R package `pcaMethods` (Stacklies, W., Redestig, H., Scholz, M., Walther, D. and Selbig, J. *Bioinformatics*, 2007, 23, 1164-1167). No obvious clustering by treatment group and/or ethnicity is observed.
